# Supplementary material for: Graphene nanosheets loaded with Pt nanoparticles with enhanced electrochemical performance for sodium–oxygen batteries
Source: Royal Society of Chemistry journal article supplement (doi:10.1039/c4ta05427j), 2014-12-23
Supplement: c4ta05427j1.pdf [file c4ta05427j1.pdf]

## Supplementary information

### Graphene nanosheets loaded with Pt nanoparticles with enhanced electrochemical performance for sodium-oxygen batteries

Sanpei Zhang<sup>a</sup>, Zhaoyin Wen<sup>\*a</sup>, Kun Rui<sup>a</sup>, Chen Shen<sup>a</sup>, Yan Lu<sup>a</sup>, Jianhua Yang<sup>a</sup>

<sup>a</sup> CAS Key Laboratory of Materials for Energy Conversion, Shanghai Institute of Ceramics, Chinese Academy of Sciences, Shanghai 200050, P. R. China. Fax: +86-21-52413903; Tel: +86-21-52411704; E-mail: [zywen@mail.sic.ac.cn](mailto:zywen@mail.sic.ac.cn)

**Materials Characterizations:** Morphologies of the synthesized electrodes were observed on a transmission electron microscope (TEMJEM-2100F). The discharge products were analyzed by the X-ray photoelectron spectroscopy (ESCALAB 250). The samples for X-ray photoelectron spectroscopy (XPS, Thermo Fisher Scientific) measurements were prepared in the argon-filled glove box. The cells were disassembled after cycling and cycled cathode samples were washed with 1,2-dimethoxyethane (anhydrous, Sigma) and then dried for 2h. A special transfer system was employed to transfer cycled cathode samples from the glove box to a XPS system without being exposed to air.

**Electrochemical Measurements:** The oxygen electrodes were prepared by mixing catalyst (GNSs and Pt@GNSs respectively) and binder (PVDF) with weight ratio of 9:1. Figure S1 shows the Na-O<sub>2</sub> battery configuration used in this study, consisting of a high purity sodium pressed on Cu foil and a PVDF-bonded cathode spreaded on a nickel foam. The positive and negative electrodes were separated by the electrolyte. The cells were assembled in an Ar-filled glove box with oxygen and water contents less than 1 ppm. The electrolyte was 1M sodium perchlorate (NaClO<sub>4</sub>, Sigma-Aldrich) in propylene carbonate (PC, Sigma-Aldrich, 99.7%), PC was dried over molecular sieves (3 Å for 1 week), sodium perchlorate under vacuum at 100 °C for 24 h. The discharge/charge measurements were performed at room temperature in the pure oxygen with a Land BT 1-40 battery test system.

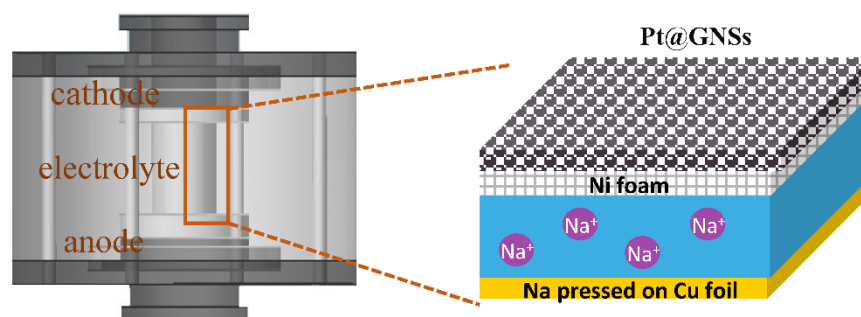

Fig. S1 Na-O<sub>2</sub> single-cell configuration

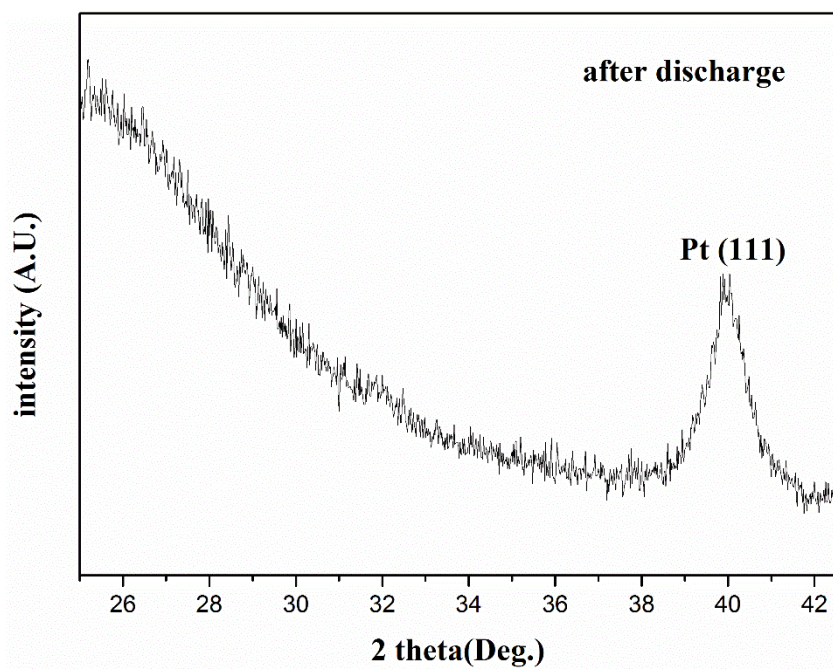

Fig. S2 XRD pattern of the positive after discharge to 1.8V
